# Supplementary material for: Post-Vaccination Syndrome: A Descriptive Analysis of Reported Symptoms and Patient Experiences After Covid-19 Immunization
Source: bioRxiv or medRxiv preprint supplement (doi:10.1101/2023.11.09.23298266), 2023-11-10
Supplement: Supplementary file [file media-1.pdf]

**TABLE OF CONTENTS**  
**Supplemental Figures and Tables**

| <b>Supplemental Document</b>                                                                                                                 | <b>Page</b> |
|----------------------------------------------------------------------------------------------------------------------------------------------|-------------|
| Supplemental Figure 1. Sample selection.....                                                                                                 | 2           |
| Supplemental Figure 2. Survey completion time.....                                                                                           | 3           |
| Supplemental Figure 3. Cumulative distribution of days between index vaccination and onset of (A) any symptoms and (B) severe symptoms ..... | 4           |
| Supplemental Figure 4. Self-reported health status .....                                                                                     | 5           |
| Supplemental Figure 5. Distribution of symptom severity .....                                                                                | 6           |
| Supplemental Figure 6. Symptom prevalence among 241 participants who reported PVS.....                                                       | 7           |
| Supplemental Table 1. Participant pre-pandemic comorbidity frequencies (N = 240).....                                                        | 9           |
| Supplemental Table 2. Participant experience (N = 241).....                                                                                  | 11          |
| Supplemental Table 3. Health status.....                                                                                                     | 16          |
| Supplemental Table 4. Symptom frequency of PVS.....                                                                                          | 17          |
| Supplemental Table 5. Participant new-onset conditions (N = 240).....                                                                        | 20          |
| Supplemental Table 6. Frequency of treatments tried by participants with PVS.....                                                            | 22          |

**Supplemental Figure 1. Sample selection.**

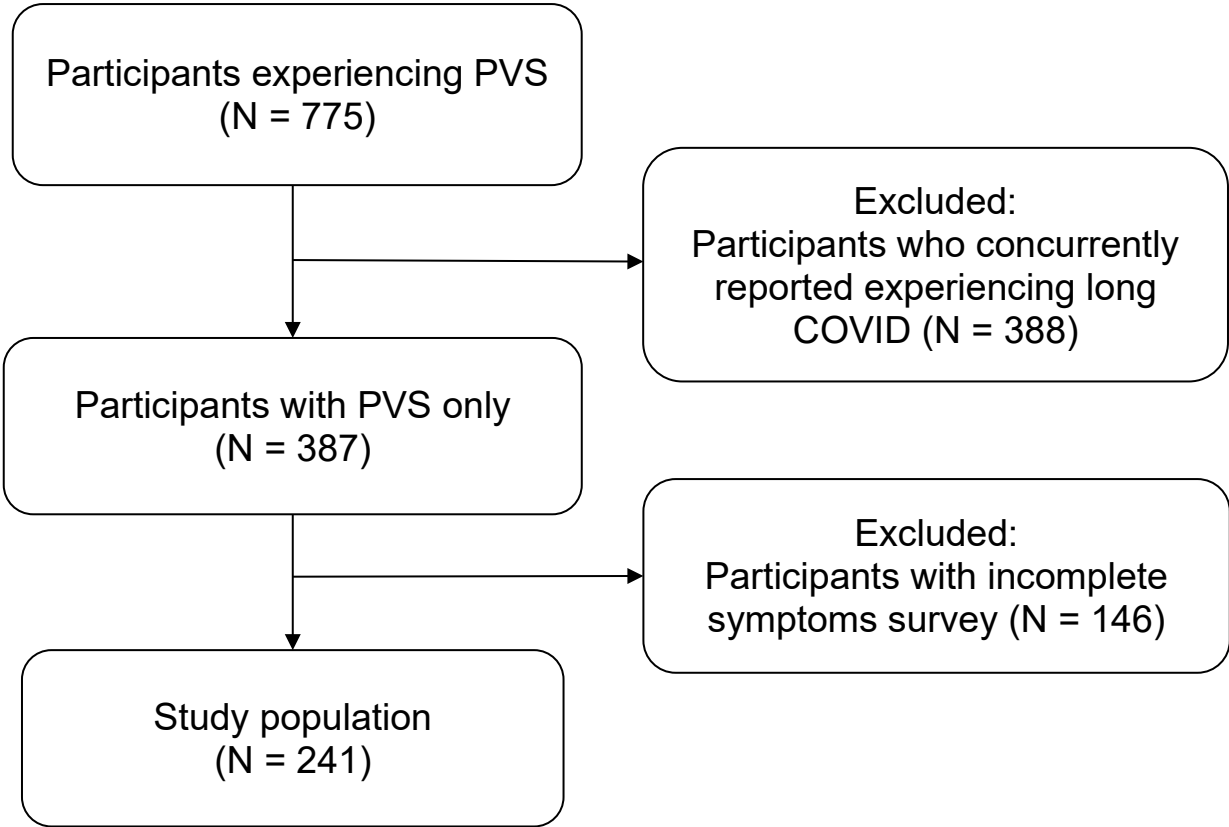

LISTEN, Listen to Immune, Symptom and Treatment Experiences Now; PVS, Post-vaccination Syndrome

Supplemental Figure 2. Survey completion time.

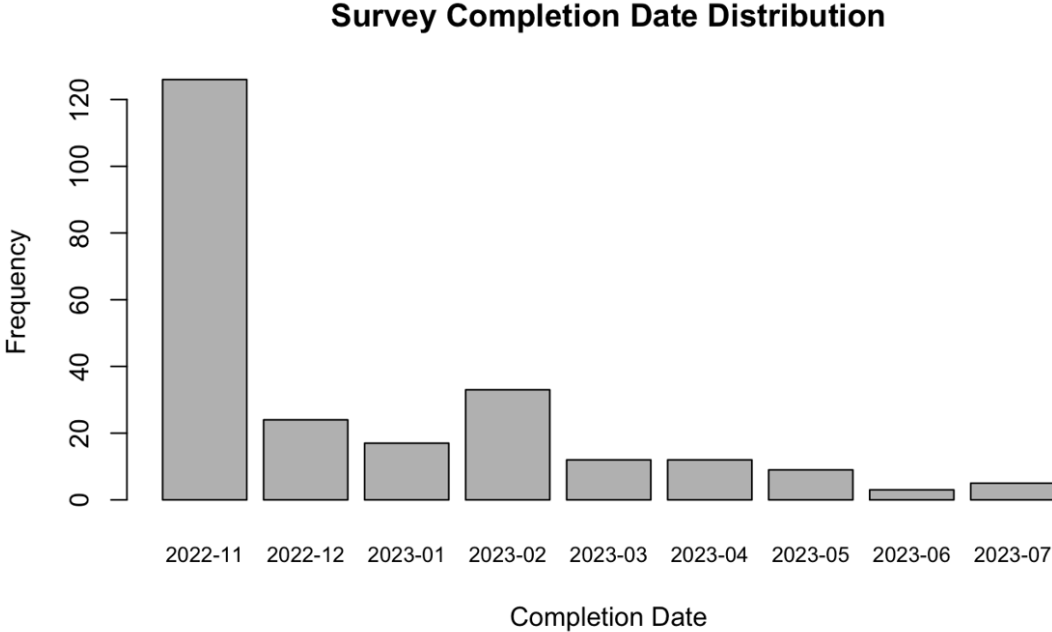

**Supplemental Figure 3. Cumulative distribution of days between index vaccination and onset of (A) any symptoms and (B) severe symptoms.**

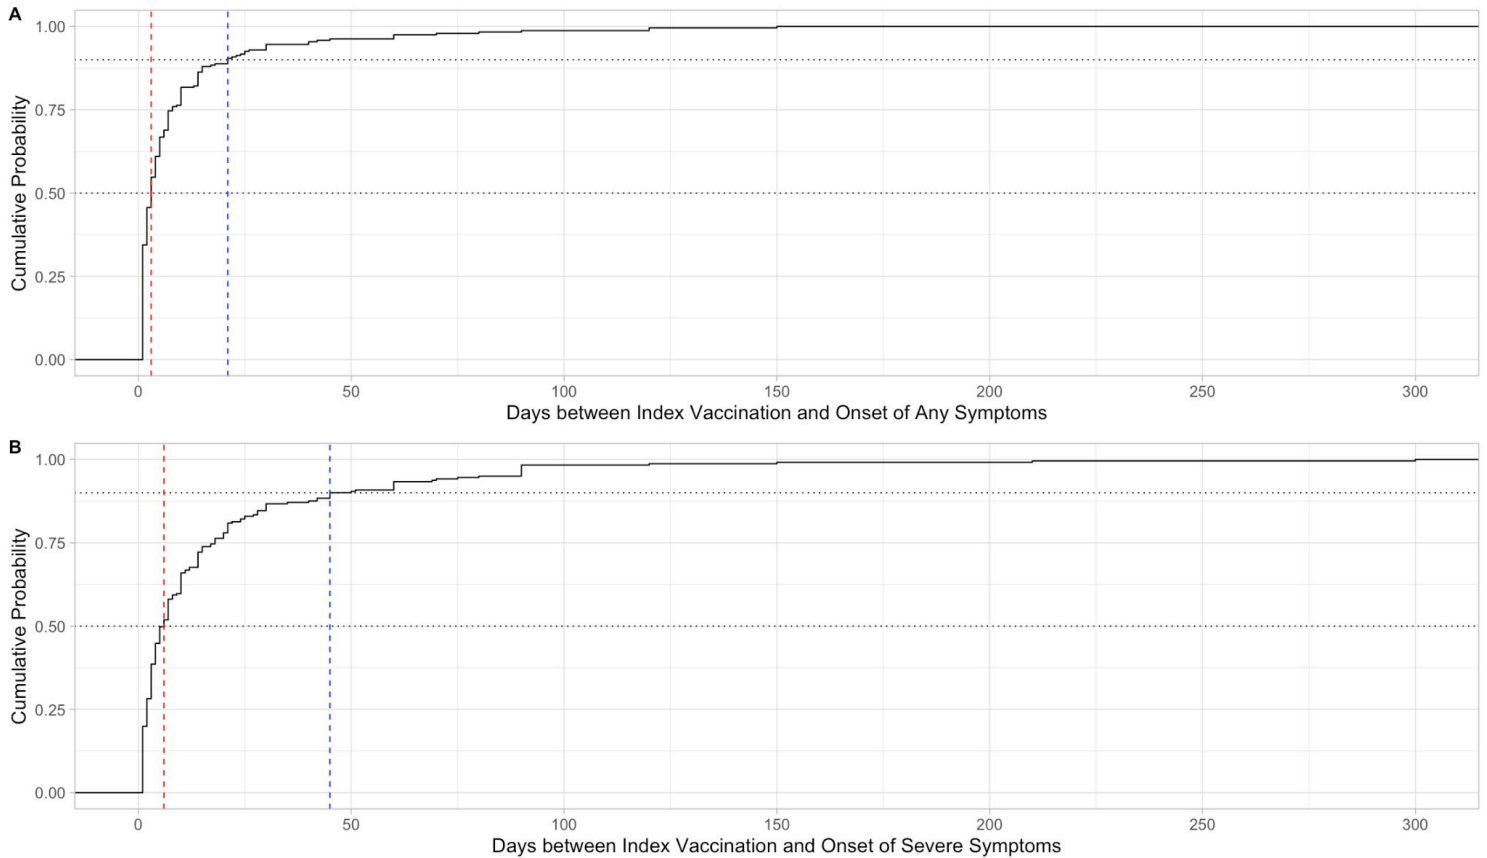

The red line indicates the median and the blue line indicates the 90% percentile.

Half of PVS participants developed any symptoms 3 days after their index vaccination and 90% developed any symptoms after 21 days of their index vaccination.

Half of PVS participants developed severe symptoms 6 days after their index vaccination and 90% developed severe symptoms 45 days after their index vaccination.

The black dotted line represents a cumulative probability of 0.5 and 0.9.

PVS, Post-vaccination Syndrome

**Supplemental Figure 4. Self-reported health status.**

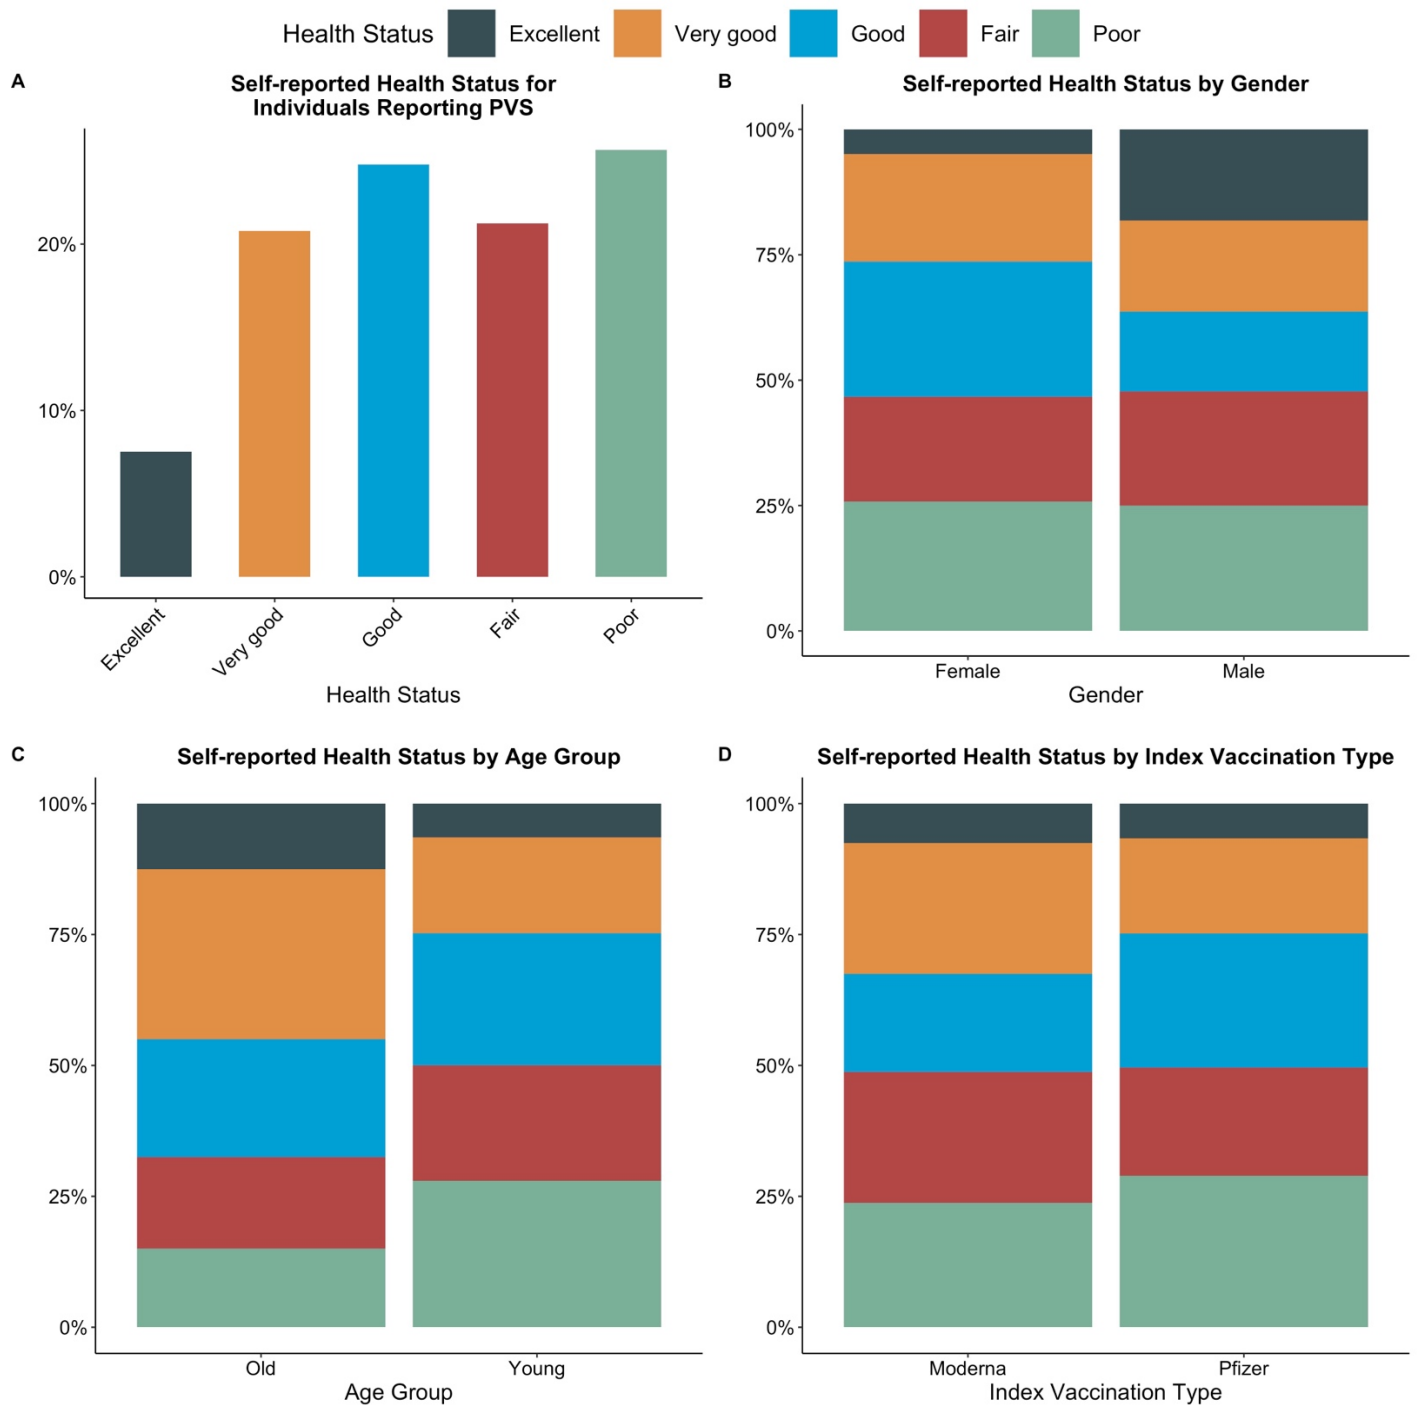

For (A) all participants reporting PVS, (B) all participants reporting PVS stratified by gender, (C) all participants reporting PVS stratified by age group, and (D) all participants reporting PVS stratified by index vaccination type. Assessed by the question, “Would you say your health in general is...” followed by six options: excellent, very good, good, fair, poor, or don’t know. The 15 respondents answering “don’t know” are excluded from the calculations used to produce these figures.

PVS, Post-vaccination Syndrome

**Supplemental Figure 5. Distribution of symptom severity.**

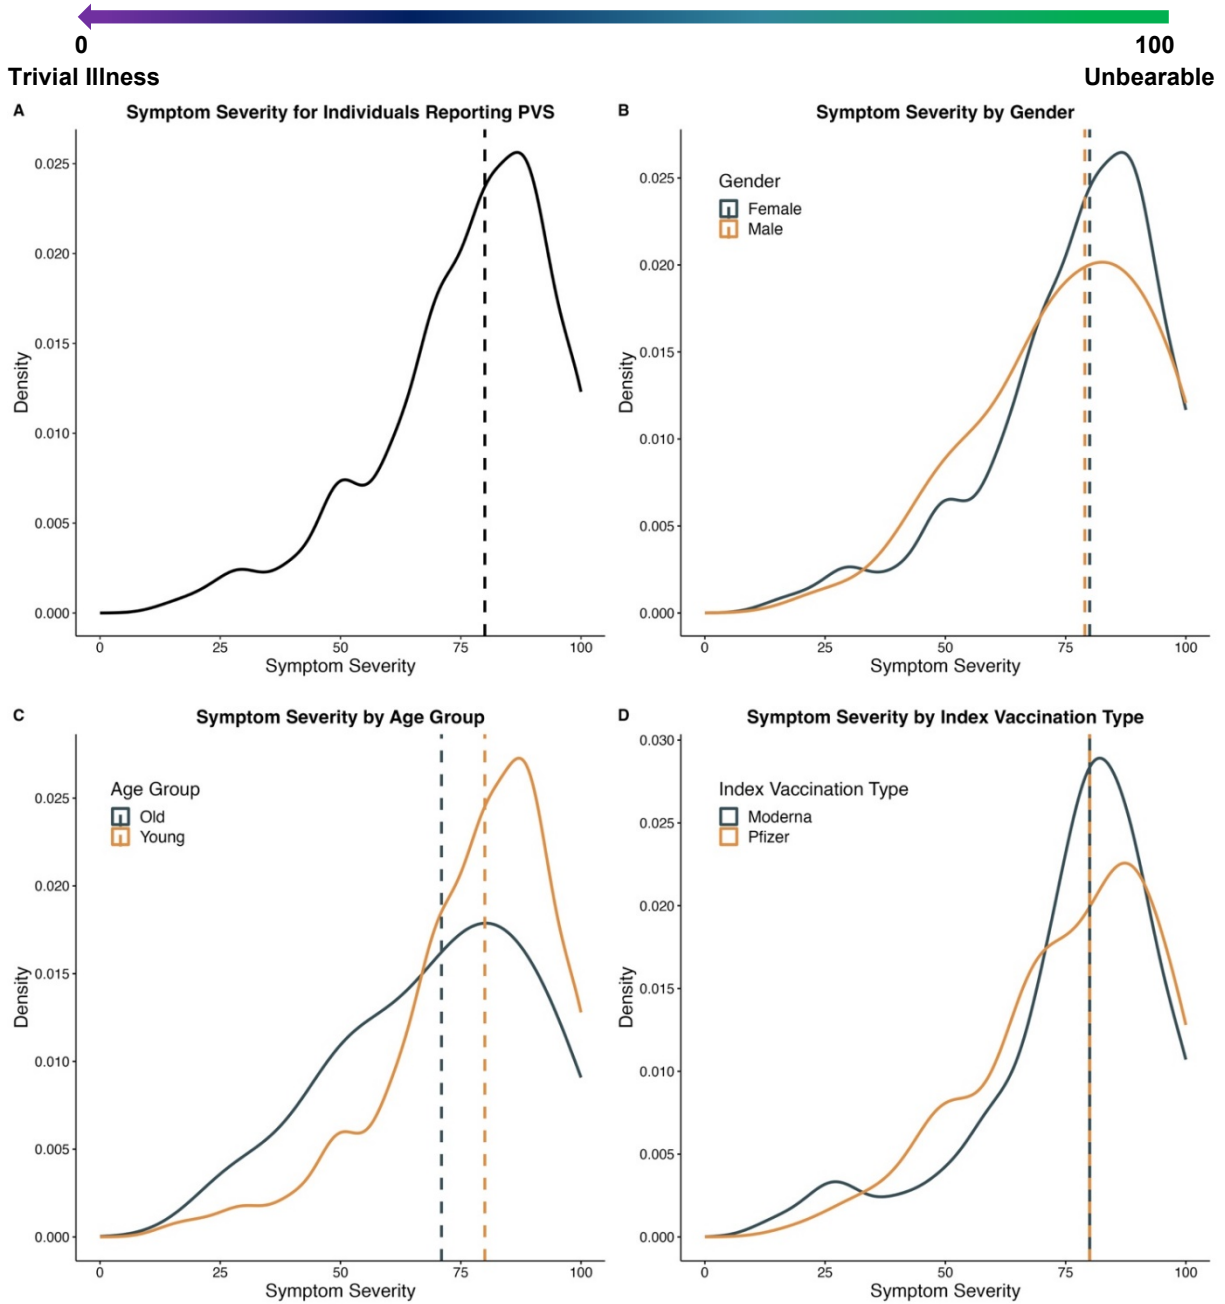

For (A) all participants who reported PVS, (B) all participants who reported PVS stratified by gender, (C) all participants who reported PVS stratified by age group, and (D) all participants who reported PVS stratified by index vaccination type. Median values are indicated with dashed lines. Assessed by the question, “We are trying to get a sense of how bad your PVS symptoms are when you feel them the most. On the slider below, with 0 being a trivial illness and 100 being unbearable, please let us know what the worst days are like.” (Supplemental Appendix [Health status questions]). PVS, Post-vaccination Syndrome

**Supplemental Figure 6. Symptom prevalence among 241 participants who reported PVS.**

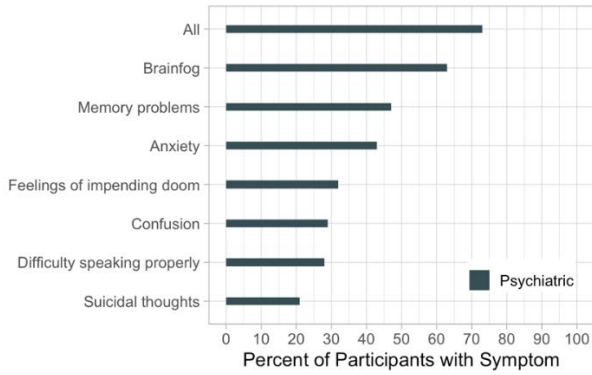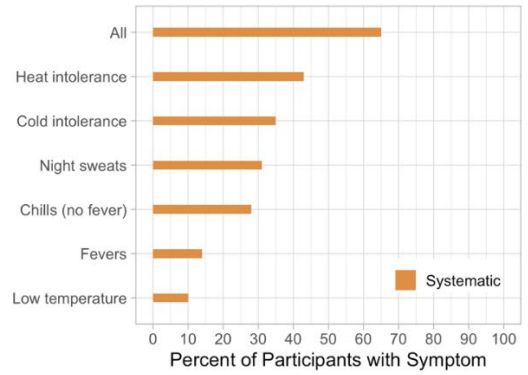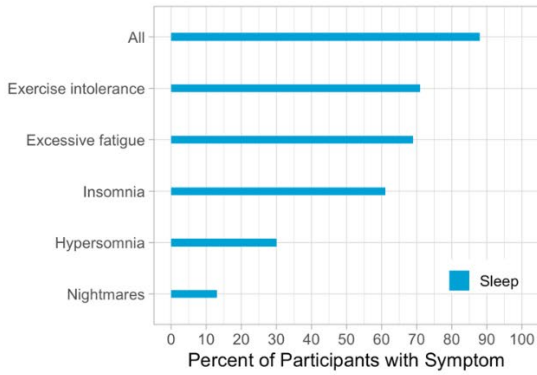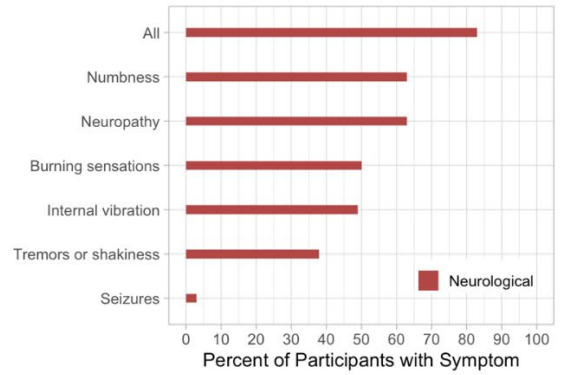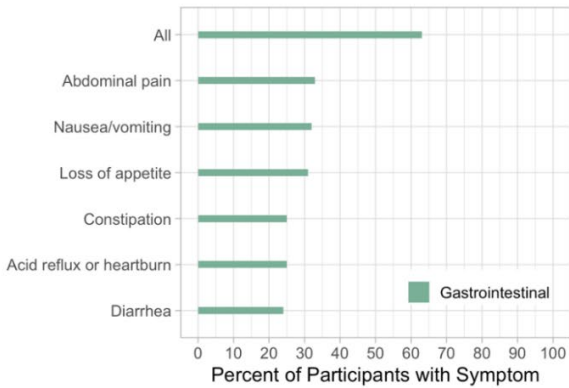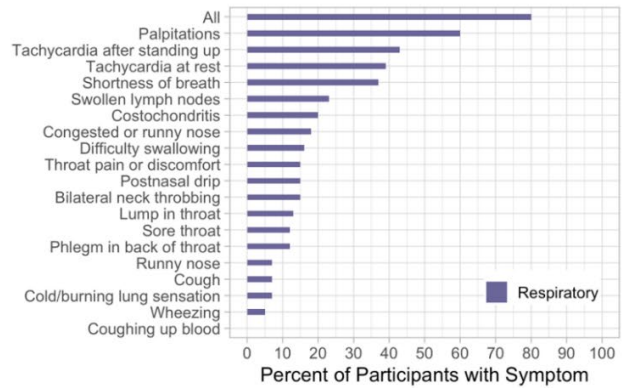

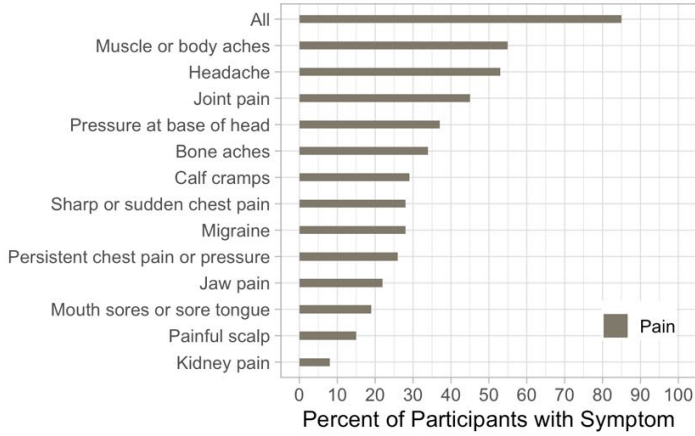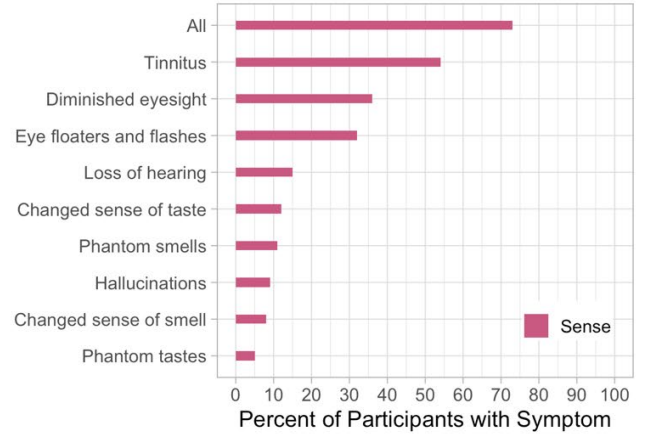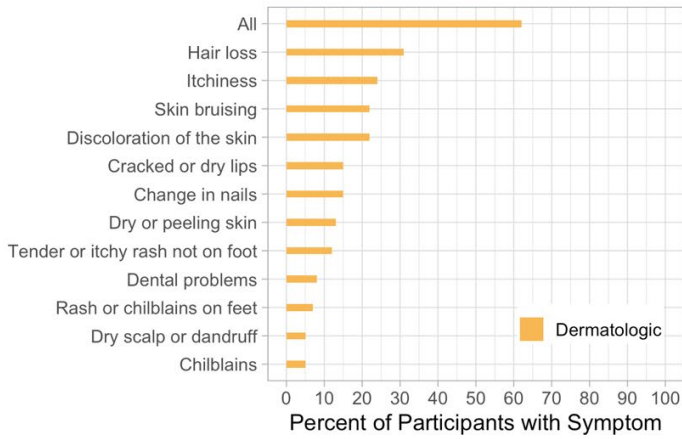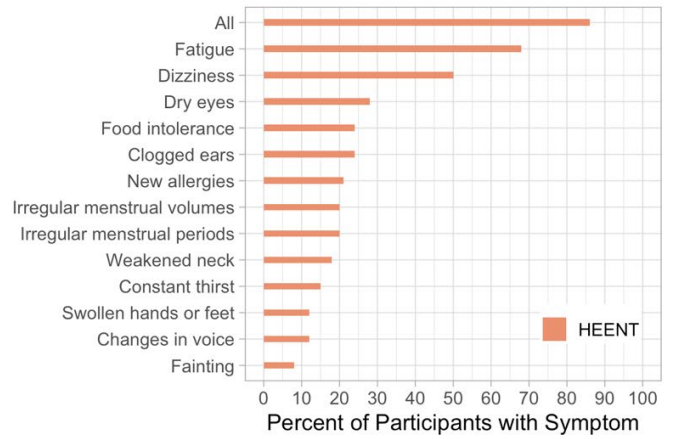

“All” row means participants who reported any of the symptoms in the corresponding symptom group.  
 HEENT, Head, Eyes, Ears, Nose, Throat; PVS, Post-vaccination Syndrome



**Supplemental Table 1. Participant pre-pandemic comorbidity frequencies (N = 240).\***

| <b>Comorbidity</b>                                                                                                                                                                            | <b>n</b> | <b>%</b> |
|-----------------------------------------------------------------------------------------------------------------------------------------------------------------------------------------------|----------|----------|
| Any allergies                                                                                                                                                                                 | 116      | 48       |
| Arthritis (including rheumatoid arthritis, gout, lupus, or fibromyalgia)                                                                                                                      | 31       | 13       |
| Asthma                                                                                                                                                                                        | 49       | 20       |
| Autoimmune disease (including lupus, scleroderma, etc.)                                                                                                                                       | 26       | 11       |
| Bleeding disorder (including sickle cell disease or Thalassemia)                                                                                                                              | 3        | 1        |
| Blood clots                                                                                                                                                                                   | 2        | 1        |
| Cancer or malignancy of any kind                                                                                                                                                              | 13       | 5        |
| Cerebrovascular conditions affecting blood vessels to or in the brain (including stroke)                                                                                                      | 2        | 1        |
| Chronic lung disease (including emphysema, chronic bronchitis, COPD, or pulmonary fibrosis)                                                                                                   | 3        | 1        |
| Cystic fibrosis                                                                                                                                                                               | 0        | 0        |
| Diabetes                                                                                                                                                                                      | 6        | 3        |
| Ehlers Danlos Syndrome (hypermobile joints)                                                                                                                                                   | 8        | 3        |
| Gastrointestinal issues (including IBS or acid reflux)                                                                                                                                        | 67       | 28       |
| Heart attack, also called myocardial infarction                                                                                                                                               | 2        | 1        |
| Heart conditions (including coronary artery disease or cardiomyopathies)                                                                                                                      | 8        | 3        |
| Heart failure                                                                                                                                                                                 | 0        | 0        |
| High cholesterol                                                                                                                                                                              | 34       | 14       |
| History of organ transplant (including kidney, liver, heart, or lung)                                                                                                                         | 0        | 0        |
| Hypertension or high blood pressure                                                                                                                                                           | 31       | 13       |
| Immunocompromised state (including weakened immune system from blood or bone marrow transplant, immune deficiencies, HIV, use of corticosteroids, or use of other immune-weakening medicines) | 6        | 3        |
| Kidney disease                                                                                                                                                                                | 1        | 0.4      |
| Liver disease                                                                                                                                                                                 | 0        | 0        |
| Lyme disease                                                                                                                                                                                  | 7        | 3        |
| MCAS or other mast cell disorders                                                                                                                                                             | 3        | 1        |
| ME/CFS                                                                                                                                                                                        | 9        | 4        |

|                                                                                                                                 |    |     |
|---------------------------------------------------------------------------------------------------------------------------------|----|-----|
| Migraines                                                                                                                       | 46 | 19  |
| Neurologic conditions (including seizures, dementia, multiple sclerosis, Parkinson's, neuropathy, small fiber neuropathy, etc.) | 9  | 4   |
| POTS or dysautonomia                                                                                                            | 8  | 3   |
| Spinal disorder(s)                                                                                                              | 9  | 4   |
| Tremors/Internal vibrations                                                                                                     | 6  | 3   |
| Depressive disorders                                                                                                            | 49 | 20  |
| Anxiety disorders                                                                                                               | 61 | 25  |
| Schizophrenia spectrum and other psychotic disorders                                                                            | 0  | 0   |
| Bipolar and related disorders                                                                                                   | 1  | 0.4 |
| Obsessive-Compulsive and related disorders                                                                                      | 6  | 3   |
| Trauma- and stressor-related disorders                                                                                          | 17 | 7   |
| Feeding and eating disorders                                                                                                    | 5  | 2   |
| Somatic symptoms (excessive thoughts, feelings and behaviors relating to the physical symptoms) and related disorders           | 2  | 1   |

\*One participant did not have a response for the pre-pandemic comorbidities. After excluding any allergies, high cholesterol, and hypertension, 59 out of 240 (25%) participants were found without any listed comorbidities.

COPD, chronic obstructive pulmonary disease; HIV, human immunodeficiency virus; IBS, irritable bowel syndrome; MCAS, mast cell activation syndrome; ME/CFS, myalgic encephalomyelitis/chronic fatigue syndrome; POTS, postural orthostatic hypotension

**Supplemental Table 2. Participant experience (N = 241).**

| <b>Characteristic</b> | <b>n</b> | <b>%</b> |
|-----------------------|----------|----------|
| <b>Felt fearful</b>   |          |          |
| Always                | 14       | 6        |
| Often                 | 46       | 19       |
| Sometimes             | 89       | 37       |
| Rarely                | 45       | 19       |
| Never                 | 44       | 18       |
| Missing               | 3        | –        |
| <b>Felt anxious</b>   |          |          |
| Always                | 8        | 3        |
| Often                 | 24       | 10       |
| Sometimes             | 74       | 31       |
| Rarely                | 74       | 31       |
| Never                 | 58       | 24       |
| Missing               | 3        | –        |
| <b>Felt worried</b>   |          |          |
| Always                | 9        | 4        |
| Often                 | 38       | 16       |
| Sometimes             | 77       | 32       |
| Rarely                | 68       | 29       |
| Never                 | 46       | 19       |
| Missing               | 3        | –        |
| <b>Felt unease</b>    |          |          |
| Always                | 14       | 6        |
| Often                 | 62       | 26       |
| Sometimes             | 102      | 43       |
| Rarely                | 43       | 18       |
| Never                 | 17       | 7        |
| Missing               | 3        | –        |
| <b>Felt worthless</b> |          |          |
| Always                | 4        | 2        |
| Often                 | 17       | 7        |

|                       |     |    |
|-----------------------|-----|----|
| Sometimes             | 48  | 20 |
| Rarely                | 47  | 20 |
| Never                 | 122 | 51 |
| Missing               | 3   | –  |
| <b>Felt helpless</b>  |     |    |
| Always                | 10  | 4  |
| Often                 | 63  | 26 |
| Sometimes             | 80  | 34 |
| Rarely                | 37  | 16 |
| Never                 | 48  | 20 |
| Missing               | 3   | –  |
| <b>Felt depressed</b> |     |    |
| Always                | 12  | 5  |
| Often                 | 34  | 14 |
| Sometimes             | 82  | 34 |
| Rarely                | 54  | 23 |
| Never                 | 56  | 24 |
| Missing               | 3   | –  |
| <b>Felt hopeless</b>  |     |    |
| Always                | 6   | 3  |
| Often                 | 44  | 18 |
| Sometimes             | 67  | 28 |
| Rarely                | 54  | 23 |
| Never                 | 67  | 28 |
| Missing               | 3   | –  |
| <b>Felt fatigued</b>  |     |    |
| Always                | 63  | 26 |
| Often                 | 93  | 39 |
| Sometimes             | 58  | 24 |
| Rarely                | 21  | 9  |
| Never                 | 3   | 1  |
| Missing               | 3   | –  |
| <b>Felt tired</b>     |     |    |
| Always                | 32  | 13 |

|                                                   |    |    |
|---------------------------------------------------|----|----|
| Often                                             | 94 | 39 |
| Sometimes                                         | 69 | 29 |
| Rarely                                            | 33 | 14 |
| Never                                             | 10 | 4  |
| Missing                                           | 3  | –  |
| <b>Felt rundown</b>                               |    |    |
| Very much                                         | 55 | 23 |
| Quite a bit                                       | 90 | 38 |
| Somewhat                                          | 49 | 21 |
| A little bit                                      | 39 | 16 |
| Not at all                                        | 5  | 2  |
| Missing                                           | 3  | –  |
| <b>Had difficulty falling asleep</b>              |    |    |
| Very much                                         | 43 | 18 |
| Quite a bit                                       | 46 | 19 |
| Somewhat                                          | 64 | 27 |
| A little bit                                      | 63 | 26 |
| Not at all                                        | 22 | 9  |
| Missing                                           | 3  | –  |
| <b>Pain interfered with activities</b>            |    |    |
| Very much                                         | 34 | 14 |
| Quite a bit                                       | 58 | 24 |
| Somewhat                                          | 62 | 26 |
| A little bit                                      | 50 | 21 |
| Not at all                                        | 34 | 14 |
| Missing                                           | 3  | –  |
| <b>Number of close people to rely on for help</b> |    |    |
| 1-2                                               | 98 | 41 |
| 3-5                                               | 98 | 41 |
| 5+                                                | 39 | 16 |
| None                                              | 3  | 1  |
| Missing                                           | 3  | –  |
| <b>Had neighbors willing to help</b>              |    |    |
| Difficult                                         | 46 | 19 |

|                             |     |    |
|-----------------------------|-----|----|
| Easy                        | 32  | 13 |
| Possible                    | 106 | 45 |
| Very difficult              | 40  | 17 |
| Very easy                   | 14  | 6  |
| Missing                     | 3   | –  |
| <b>Had someone to help</b>  |     |    |
| Always                      | 78  | 33 |
| Usually                     | 92  | 39 |
| Sometimes                   | 44  | 18 |
| Rarely                      | 15  | 6  |
| Never                       | 9   | 4  |
| Missing                     | 3   | –  |
| <b>Lacked companionship</b> |     |    |
| Hardly ever or never        | 103 | 43 |
| Often                       | 47  | 20 |
| Some of the time            | 88  | 37 |
| Missing                     | 3   | –  |
| <b>Felt left out</b>        |     |    |
| Hardly ever or never        | 70  | 30 |
| Often                       | 55  | 23 |
| Some of the time            | 112 | 47 |
| Missing                     | 4   | –  |
| <b>Felt isolated</b>        |     |    |
| Hardly ever or never        | 52  | 22 |
| Often                       | 77  | 32 |
| Some of the time            | 109 | 46 |
| Missing                     | 3   | –  |
| <b>Felt lonely</b>          |     |    |
| Hardly ever                 | 53  | 22 |
| Never                       | 27  | 11 |
| Occasionally                | 77  | 32 |
| Often/Always                | 28  | 12 |
| Some of the time            | 53  | 22 |
| Missing                     | 3   | –  |

|                                                                              |     |     |
|------------------------------------------------------------------------------|-----|-----|
| <b>Living situation</b>                                                      |     |     |
| I do not have a steady place to live                                         | 1   | 0.4 |
| I have a place to live today, but I am worried about losing it in the future | 16  | 7   |
| I have a steady place to live                                                | 221 | 93  |
| Missing                                                                      | 3   | –   |
| <b>Food insecurity</b>                                                       |     |     |
| Never true                                                                   | 217 | 91  |
| Often true                                                                   | 4   | 2   |
| Sometimes true                                                               | 17  | 7   |
| Missing                                                                      | 3   | –   |
| <b>Unmet medical transport</b>                                               |     |     |
| No                                                                           | 231 | 96  |
| Yes                                                                          | 10  | 4   |
| <b>Unmet non-medical transport</b>                                           |     |     |
| No                                                                           | 228 | 95  |
| Yes                                                                          | 13  | 5   |

**Supplemental Table 3. Health status.**

| <b>Characteristic</b>                                                                    | <b>n</b>   | <b>%</b> |
|------------------------------------------------------------------------------------------|------------|----------|
| <b>Euro-QoL visual analogue scale (0-100)<sup>1, 2</sup></b>                             | 50 (39-70) | –        |
| <b>How bad are your PVS or other symptoms (0-100) on your worst days?<sup>1, 3</sup></b> | 80 (69-89) | –        |
| Missing                                                                                  | 3          | –        |
| <b>Self-reported health status<sup>1</sup></b>                                           |            |          |
| Don't know                                                                               | 15         | 6        |
| Excellent                                                                                | 17         | 7        |
| Fair                                                                                     | 48         | 20       |
| Good                                                                                     | 56         | 23       |
| Poor                                                                                     | 58         | 24       |
| Very good                                                                                | 47         | 20       |

<sup>1</sup>Median (IQR) EQ-VAS and symptom severity; n/N, % for self-reported health status

<sup>2</sup>The Euro-QoL visual analogue scale is measured from 0 (worst imaginable health) to 100 (best imaginable health).

<sup>3</sup>Symptom severity is measured from 0 (trivial illness) to 100 (unbearable).

PVS, Post-vaccination Syndrome



**Supplemental Table 4. Symptom frequency of PVS.**

| <b>Symptom</b>                              | <b>n</b> | <b>%</b> |
|---------------------------------------------|----------|----------|
| Abdominal pain                              | 80       | 33       |
| Acid reflux or heartburn                    | 61       | 25       |
| Anxiety                                     | 104      | 43       |
| Bilateral neck throbbing around lymph nodes | 35       | 15       |
| Bone aches                                  | 81       | 34       |
| Brain fog                                   | 151      | 63       |
| Burning sensations                          | 121      | 50       |
| Calf cramps                                 | 71       | 29       |
| Change in nails                             | 37       | 15       |
| Changed sense of smell                      | 20       | 8        |
| Changed sense of taste                      | 28       | 12       |
| Changes in voice                            | 30       | 12       |
| Chilblains                                  | 11       | 5        |
| Chills (no fever)                           | 68       | 28       |
| Clogged ears                                | 59       | 24       |
| Cold intolerance                            | 85       | 35       |
| Cold or burning feeling in lungs            | 16       | 7        |
| Confusion                                   | 71       | 29       |
| Congested or runny nose                     | 44       | 18       |
| Constant thirst                             | 37       | 15       |
| Constipation                                | 60       | 25       |
| Costochondritis                             | 49       | 20       |
| Cough                                       | 18       | 7        |
| Coughing up blood                           | 1        | 0.4      |
| Cracked or dry lips                         | 35       | 15       |
| Dental problems                             | 20       | 8        |
| Diarrhea                                    | 59       | 24       |
| Difficulty speaking properly                | 67       | 28       |
| Difficulty swallowing                       | 38       | 16       |
| Discoloration of the skin                   | 52       | 22       |
| Dizziness                                   | 121      | 50       |
| Dry eyes                                    | 67       | 28       |
| Dry or peeling skin                         | 32       | 13       |
| Dry scalp or dandruff                       | 11       | 5        |
| Excessive fatigue                           | 167      | 69       |
| Exercise intolerance                        | 170      | 71       |
| Fainting                                    | 20       | 8        |

|                                                          |     |    |
|----------------------------------------------------------|-----|----|
| Fatigue                                                  | 165 | 68 |
| Feelings of impending doom                               | 77  | 32 |
| Fevers                                                   | 33  | 14 |
| Floaters or flashes of light in vision                   | 77  | 32 |
| Hair loss                                                | 74  | 31 |
| Hallucinations                                           | 21  | 9  |
| Headache                                                 | 128 | 53 |
| Heat intolerance                                         | 104 | 43 |
| Hypersomnia                                              | 72  | 30 |
| Inability to eat or tolerate food                        | 58  | 24 |
| Insomnia                                                 | 148 | 61 |
| Internal tremors or buzzing/vibration                    | 118 | 49 |
| Irregular or skipped menstrual cycles                    | 49  | 20 |
| Itchiness                                                | 57  | 24 |
| Jaw pain                                                 | 53  | 22 |
| Joint pain                                               | 108 | 45 |
| Kidney pain                                              | 20  | 8  |
| Loss of appetite                                         | 74  | 31 |
| Loss of hearing                                          | 35  | 15 |
| Loss or decrease in quality of vision                    | 86  | 36 |
| Low temperature                                          | 23  | 10 |
| Lump in throat                                           | 31  | 13 |
| Memory problems                                          | 113 | 47 |
| Menstrual cycles that are heavier or lighter than normal | 49  | 20 |
| Migraine                                                 | 68  | 28 |
| Mouth sores or sore tongue                               | 46  | 19 |
| Muscle or body aches                                     | 132 | 55 |
| Nausea/vomiting                                          | 76  | 32 |
| Neuropathy                                               | 151 | 63 |
| New allergies                                            | 51  | 21 |
| Night sweats                                             | 74  | 31 |
| Nightmares                                               | 32  | 13 |
| Numbness                                                 | 153 | 63 |
| Painful scalp                                            | 37  | 15 |
| Palpitations                                             | 145 | 60 |
| Persistent chest pain or pressure                        | 63  | 26 |
| Phantom smells                                           | 26  | 11 |
| Phantom tastes                                           | 11  | 5  |
| Phlegm in back of throat                                 | 30  | 12 |
| Postnasal drip                                           | 35  | 15 |
| Pressure at base of head                                 | 90  | 37 |

|                                                        |     |    |
|--------------------------------------------------------|-----|----|
| Runny nose                                             | 17  | 7  |
| Seizures                                               | 7   | 3  |
| Sharp or sudden chest pain                             | 68  | 28 |
| Shortness of breath or difficulty breathing            | 88  | 37 |
| Skin bruising                                          | 53  | 22 |
| Sore throat                                            | 28  | 12 |
| Suicidal thoughts                                      | 50  | 21 |
| Swollen hands or feet                                  | 30  | 12 |
| Swollen lymph nodes                                    | 55  | 23 |
| Tachycardia after standing up                          | 103 | 43 |
| Tachycardia at rest                                    | 94  | 39 |
| Tender or itchy rash not on foot                       | 28  | 12 |
| Tender or itchy rash or chilblains on the toes or foot | 16  | 7  |
| Throat pain or discomfort                              | 36  | 15 |
| Tinnitus or humming in ears                            | 131 | 54 |
| Tremors or shakiness                                   | 91  | 38 |
| Weakened neck                                          | 43  | 18 |
| Wheezing                                               | 13  | 5  |

PVS, Post-vaccination Syndrome

**Supplemental Table 5. Participant new-onset conditions (N = 240).<sup>1</sup>**

| <b>New-onset Condition</b>                                                                                                                                                                    | <b>n (%)</b> |
|-----------------------------------------------------------------------------------------------------------------------------------------------------------------------------------------------|--------------|
| Any allergies                                                                                                                                                                                 | 108 (45)     |
| Arthritis (including rheumatoid arthritis, gout, lupus, or fibromyalgia)                                                                                                                      | 42 (17)      |
| Asthma                                                                                                                                                                                        | 37 (15)      |
| Autoimmune disease (including lupus, scleroderma, etc.)                                                                                                                                       | 47 (20)      |
| Bleeding disorder (including sickle cell disease or Thalassemia)                                                                                                                              | 2 (1)        |
| Blood clots                                                                                                                                                                                   | 10 (4)       |
| Cancer or malignancy of any kind                                                                                                                                                              | 7 (3)        |
| Cerebrovascular conditions affecting blood vessels to or in the brain (including stroke)                                                                                                      | 13 (5)       |
| Chronic lung disease (including emphysema, chronic bronchitis, COPD, or pulmonary fibrosis)                                                                                                   | 5 (2)        |
| Cystic fibrosis                                                                                                                                                                               | 0 (0)        |
| Diabetes                                                                                                                                                                                      | 6 (3)        |
| Ehlers Danlos Syndrome (hypermobile joints)                                                                                                                                                   | 15 (6)       |
| Gastrointestinal issues (including IBS or acid reflux)                                                                                                                                        | 73 (30)      |
| Heart attack/myocardial infarction                                                                                                                                                            | 3 (1)        |
| Heart conditions (including coronary artery disease or cardiomyopathies)                                                                                                                      | 31 (13)      |
| Heart failure                                                                                                                                                                                 | 3 (1)        |
| High cholesterol                                                                                                                                                                              | 52 (22)      |
| History of organ transplant (including kidney, liver, heart, or lung)                                                                                                                         | 0 (0)        |
| Hypertension or high blood pressure                                                                                                                                                           | 45 (19)      |
| Immunocompromised state (including weakened immune system from blood or bone marrow transplant, immune deficiencies, HIV, use of corticosteroids, or use of other immune-weakening medicines) | 22 (9)       |
| Kidney disease                                                                                                                                                                                | 2 (1)        |
| Liver disease                                                                                                                                                                                 | 6 (3)        |
| Long COVID                                                                                                                                                                                    | 21 (9)       |
| Lyme disease                                                                                                                                                                                  | 9 (4)        |
| MCAS or other mast cell disorders                                                                                                                                                             | 28 (12)      |
| ME/CFS                                                                                                                                                                                        | 28 (12)      |
| Migraines                                                                                                                                                                                     | 53 (22)      |
| Neurological conditions (including seizures, dementia, multiple sclerosis, Parkinson's, neuropathy, small fiber neuropathy, etc.)                                                             | 79 (33)      |
| POTS or dysautonomia                                                                                                                                                                          | 70 (29)      |
| Spinal disorder(s)                                                                                                                                                                            | 13 (5)       |
| Vaccine injury                                                                                                                                                                                | 133 (55)     |
| Depressive disorders                                                                                                                                                                          | 49 (20)      |
| Anxiety disorders                                                                                                                                                                             | 86 (36)      |
| Schizophrenia spectrum and other psychotic disorders                                                                                                                                          | 0 (0)        |

|                                            |         |
|--------------------------------------------|---------|
| Bipolar and related disorders              | 1 (0.4) |
| Obsessive-Compulsive and related disorders | 6 (3)   |
| Trauma- and stressor-related disorders     | 25 (10) |
| Feeding and eating disorders               | 4 (2)   |
| Somatic symptom and related disorders      | 4 (2)   |

<sup>1</sup>One participant did not provide a response for new onset medical conditions.  
 COPD, chronic obstructive pulmonary disease; HIV, human immunodeficiency virus; IBS, irritable bowel syndrome; MCAS, mast cell activation syndrome; ME/CFS, myalgic encephalomyelitis/chronic fatigue syndrome; POTS, postural orthostatic hypotension

**Supplemental Table 6. Frequency of treatments tried by participants with PVS.**

| <b>Category</b>          | <b>Treatment</b>                               | <b>n (%)</b> |
|--------------------------|------------------------------------------------|--------------|
| Vitamins and Supplements | Vitamin B1 (Thiamine)                          | 52 (22)      |
|                          | Vitamin B2 (Riboflavin)                        | 42 (17)      |
|                          | Vitamin B3 (Niacin)                            | 36 (15)      |
|                          | Vitamin B6 (Pyridoxine)                        | 39 (16)      |
|                          | Vitamin B complex                              | 102 (42)     |
|                          | Vitamin B12 (hydroxocobalamin, cyanocobalamin) | 103 (43)     |
|                          | Vitamin C (ascorbic acid)                      | 128 (53)     |
|                          | Vitamin D (calciferol)                         | 157 (65)     |
|                          | Vitamin E (alpha-tocopherol)                   | 22 (9)       |
|                          | Vitamin K2 (menaquinone)                       | 52 (22)      |
|                          | Zinc                                           | 86 (36)      |
|                          | Copper                                         | 12 (5)       |
|                          | CoQ10                                          | 74 (31)      |
|                          | Magnesium                                      | 135 (56)     |
|                          | Alpha lipoic acid                              | 62 (26)      |
|                          | Flavonoids (Quercetin, Luteolin, BrainGain)    | 71 (29)      |
|                          | NAC (N-Acetyl Cysteine)/Glycine                | 79 (33)      |
|                          | Glutathione                                    | 47 (20)      |
|                          | Glutamine                                      | 10 (4)       |
|                          | PEA (Palmitoylethanolamide)                    | 17 (7)       |
| H1 Antihistamines        | Turmeric (Curcumin)                            | 96 (40)      |
|                          | Omega 3s/Fish oil                              | 97 (40)      |
|                          | Acetyl-L-Carnitine                             | 30 (12)      |
|                          | L-Lysine                                       | 25 (10)      |
|                          | Loratadine (Claritin)                          | 84 (35)      |
|                          | Cetirizine (Zyrtec)                            | 87 (36)      |
|                          | Fexofenadine (Allegra)                         | 39 (16)      |
| H2 Antihistamines        | Diphenhydramine (Benadryl)                     | 67 (28)      |
|                          | Chlorpheniramine (Chlor-Trimeton)              | 3 (1)        |
|                          | Hydroxyzine (Atarax) (Rx)                      | 22 (9)       |
|                          | Famotidine (Pepcid)                            | 91 (38)      |

|                                |                                                                                                                                                                         |          |
|--------------------------------|-------------------------------------------------------------------------------------------------------------------------------------------------------------------------|----------|
|                                | Cimetidine (Tagamet)                                                                                                                                                    | 4 (2)    |
| Motion Sickness Drugs          | Dimenhydrinate (Dramamine)                                                                                                                                              | 11 (5)   |
|                                | Meclizine (Bonine)                                                                                                                                                      | 17 (7)   |
|                                | Scopolamine                                                                                                                                                             | 2 (1)    |
| NSAIDs                         | Ibuprofen (Advil, Motrin, Provil)                                                                                                                                       | 129 (54) |
|                                | Naproxen (Aleve, Mediproxen, All Day Pain Relief)                                                                                                                       | 58 (24)  |
|                                | Aspirin [Acetylsalicylic acid] (Ascriptin, Aspercin, Aspirin, Buffasal, Bufferin, Buffinol, Easprin, Ecotrin, Vazalore), 81 mg (baby aspirin), 325 mg (regular aspirin) | 84 (35)  |
| Non-NSAID Painkillers          | Acetaminophen [Paracetamol] (Tylenol, Panadol, Apra, FeverAll, Mapap, Pharbetol)                                                                                        | 111 (46) |
| Herbal and Natural Supplements | Black seed oil                                                                                                                                                          | 43 (18)  |
|                                | Milk thistle                                                                                                                                                            | 27 (11)  |
|                                | Astaxanthin                                                                                                                                                             | 7 (3)    |
|                                | Nattokinase                                                                                                                                                             | 32 (13)  |
|                                | Moringa                                                                                                                                                                 | 9 (4)    |
|                                | Melatonin                                                                                                                                                               | 79 (33)  |
|                                | Reishi, Lion's Mane, Cordyceps (mushrooms)                                                                                                                              | 28 (12)  |
|                                | CBD (oral, topical, inhaled)                                                                                                                                            | 68 (28)  |
|                                | Cannabis                                                                                                                                                                | 33 (14)  |
|                                | Eastern white pine needle                                                                                                                                               | 19 (8)   |
|                                | Nettles                                                                                                                                                                 | 13 (5)   |
|                                | Dandelion                                                                                                                                                               | 32 (13)  |
|                                | St. John's Wort (hypericum perforatum)                                                                                                                                  | 4 (2)    |
| Probiotics                     |                                                                                                                                                                         | 238 (99) |
| Mast Cell Stabilizers          | Cromoglicic acid (Cromolyn) oral, nasal spray                                                                                                                           | 20 (8)   |
|                                | Ketotifen (Zaditor)                                                                                                                                                     | 12 (5)   |
|                                | Montelukast (Singulair)                                                                                                                                                 | 22 (9)   |
|                                | Omalizumab (Xolair)                                                                                                                                                     | 1 (0.4)  |
|                                | DAO enzyme supplement (OTC)                                                                                                                                             | 19 (8)   |
| Antibiotics                    | Macrolides (Azithromycin, Clarithromycin, Erythromycin)                                                                                                                 | 7 (3)    |
|                                | Fluoroquinolones (Ciprofloxacin, Levofloxacin, other)                                                                                                                   | 2 (1)    |
|                                | Cephalosporins (Cephalexin, Ceftriaxone, other)                                                                                                                         | 2 (1)    |
|                                | Penicillin (Penicillin, Amoxicillin, other)                                                                                                                             | 10 (4)   |
|                                | Doxycycline                                                                                                                                                             | 17 (7)   |

|                                           |                                                                                               |          |
|-------------------------------------------|-----------------------------------------------------------------------------------------------|----------|
| Antiparasitic and Antimalarial Treatments | Ivermectin (Stromectol)                                                                       | 44 (18)  |
|                                           | Hydroxychloroquine (Plaquenil)                                                                | 19 (8)   |
|                                           | Chloroquine (Aralen)                                                                          | 0 (0)    |
| Steroids                                  | Oral (Prednisone, Dexamethasone, Hydrocortisone, Methylprednisolone, other)                   | 116 (48) |
|                                           | IV steroids (Hydrocortisone, Methylprednisolone, other)                                       | 12 (5)   |
|                                           | Inhaled steroids (Mometasone [Asmanex], Fluticasone [Flovent], Budesonide [Pulmicort], other) | 24 (10)  |
|                                           | Other steroid injections (intratympanic, spinal)                                              | 9 (4)    |
| Anticoagulants                            | Heparin                                                                                       | 3 (1)    |
|                                           | Warfarin (Coumadin)                                                                           | 0 (0)    |
|                                           | Direct oral anticoagulant: Apixaban (Eliquis)                                                 | 2 (1)    |
|                                           | Direct oral anticoagulant: Dabigatran (Pradaxa)                                               | 1 (0.4)  |
|                                           | Direct oral anticoagulant: Rivaroxaban (Xarelto)                                              | 4 (2)    |
|                                           | Direct oral anticoagulant: Edoxaban (Savaysa)                                                 | 0 (0)    |
|                                           | Direct oral anticoagulant: Betrixaban (Bevyxxa)                                               | 0 (0)    |
| Anti-Platelet Therapies                   | Clopidogrel (Plavix)                                                                          | 7 (3)    |
| Anti-Inflammatory Drugs                   | Colchicine (Colcrys, Mitigare, Gloperba)                                                      | 14 (6)   |
| Antiviral Drugs for COVID-19              | Nirmatrelvir/Ritonavir (Paxlovid)                                                             | 4 (2)    |
|                                           | Molnupiravir (Lagevrio)                                                                       | 0 (0)    |
|                                           | Remdesivir (Veklury)                                                                          | 0 (0)    |
| Antivirals for Herpesvirus                | Valacyclovir (Valtrex)                                                                        | 23 (10)  |
|                                           | Famciclovir (Famvir)                                                                          | 3 (1)    |
|                                           | Acyclovir (Zovirax)                                                                           | 10 (4)   |
| Monoclonal Antibody Therapies             | Casirivimab/Imdevimab (Regeneron)                                                             | 7 (3)    |
|                                           | Bamlanivimab and etesevimab                                                                   | 2 (1)    |
|                                           | Sotrovimab (Xevudy)                                                                           | 0 (0)    |
|                                           | Bebtelovimab                                                                                  | 0 (0)    |
|                                           | Tixagevimab and cilgavimab (Evusheld)                                                         | 4 (2)    |
| Blood Derived Treatments                  | Intravenous Immunoglobulin (IVIG)                                                             | 17 (7)   |
|                                           | Subcutaneous Immunoglobulin (SCIG)                                                            | 2 (1)    |
|                                           | Convalescent plasma                                                                           | 0 (0)    |
| Immunomodulatory Drugs                    | Eculizumab (Soliris)                                                                          | 0 (0)    |
|                                           | IL-1 antagonist (Anakinra [Kineret], Canakinumab [Ilaris], other)                             | 2 (1)    |



|                                        |                                                                                                                                                                           |         |
|----------------------------------------|---------------------------------------------------------------------------------------------------------------------------------------------------------------------------|---------|
|                                        | IL-6 antagonist (Siltuximab [Sylvant], Sarilumab [Kevzara], Tocilizumab [Actemra], other)                                                                                 | 0 (0)   |
|                                        | Kinase inhibitors (Acalabrutinib [Calquence], Ibrutinib [Imbruvica], Zanubrutinib [Brukinsa], Baricitinib [Olumiant], Ruxolitinib [Jakafi], Tofacitinib [Xeljanz], other) | 1 (0.4) |
|                                        | T-Cell and B-Cell inhibitors (mycophenolate mofetil [CellCept])                                                                                                           | 2 (1)   |
|                                        | Monoclonal immunosuppressives: CD-20/B-Cell modulator                                                                                                                     | 1 (0.4) |
|                                        | Monoclonal immunosuppressives: Rituximab (Riabni, Rituxan, Ruxience, Truxima)                                                                                             | 0 (0)   |
|                                        | Monoclonal immunosuppressives: Leronlimab                                                                                                                                 | 0 (0)   |
|                                        | CCR5 entry inhibitors: Maraviroc (Selzentry)                                                                                                                              | 11 (5)  |
| G-Protein Coupled Receptor Medications | BC 007                                                                                                                                                                    | 0 (0)   |
| Anticonvulsant                         | Gabapentin (Neurontin, Gralise)                                                                                                                                           | 61 (25) |
|                                        | Pregabalin (Lyrica)                                                                                                                                                       | 13 (5)  |
|                                        | Lamotrigine (Lamictal)                                                                                                                                                    | 2 (1)   |
|                                        | Carbamazepine (Tegretol)                                                                                                                                                  | 2 (1)   |
| Antidepressants                        | Duloxetine (Cymbalta)                                                                                                                                                     | 22 (9)  |
|                                        | Doxepin (Sinequan)                                                                                                                                                        | 2 (1)   |
|                                        | Amitriptyline (Elavil)                                                                                                                                                    | 15 (6)  |
|                                        | Nortriptyline (Pamelor)                                                                                                                                                   | 7 (3)   |
|                                        | Fluvoxamine (Luvox)                                                                                                                                                       | 16 (7)  |
|                                        | Mirtazapine (Remeron)                                                                                                                                                     | 2 (1)   |
|                                        | Fluoxetine (Prozac)                                                                                                                                                       | 8 (3)   |
|                                        | Escitalopram (Lexapro)                                                                                                                                                    | 18 (7)  |
|                                        | Citalopram (Celexa)                                                                                                                                                       | 5 (2)   |
|                                        | Paroxetine (Brisdelle, Paxil, Pexeva)                                                                                                                                     | 1 (0.4) |
|                                        | Sertraline (Zoloft)                                                                                                                                                       | 11 (5)  |
|                                        | Desvenlafaxine (Pristiq)                                                                                                                                                  | 1 (0.4) |
|                                        | Venlafaxine (Effexor)                                                                                                                                                     | 8 (3)   |
| Benzodiazepines                        | Alprazolam (Xanax)                                                                                                                                                        | 15 (6)  |
|                                        | Clonazepam (Klonopin)                                                                                                                                                     | 19 (8)  |
|                                        | Lorazepam (Ativan)                                                                                                                                                        | 21 (9)  |
|                                        | Diazepam (Valium)                                                                                                                                                         | 6 (2)   |
|                                        | Triazolam (Halcion)                                                                                                                                                       | 0 (0)   |

|                                  |                                    |         |
|----------------------------------|------------------------------------|---------|
|                                  | Temazepam (Restoril)               | 1 (0.4) |
| Muscle Relaxants                 | Baclofen (Lioresal)                | 8 (3)   |
|                                  | Methocarbamol (Robaxin)            | 5 (2)   |
|                                  | Cyclobenzaprine (Flexeril)         | 22 (9)  |
|                                  | Metaxalone (Skelaxin)              | 1 (0.4) |
|                                  | Tizanidine (Zanaflex)              | 13 (5)  |
| Sleep Medications                | Zolpidem (Ambien)                  | 13 (5)  |
|                                  | Zaleplon (Sonata)                  | 0 (0)   |
|                                  | Trazodone (Desyrel)                | 12 (5)  |
| Opioid Antagonists               | Low dose Naltrexone                | 48 (20) |
| Beta Blockers                    | Propranolol (Inderal)              | 27 (11) |
|                                  | Metoprolol (Lopressor)             | 24 (10) |
|                                  | Nebivolol (Bystolic)               | 2 (1)   |
| Other Blood Pressure Medications | Lisinopril (Prinivil, Zestril)     | 7 (3)   |
|                                  | Enalapril (Epaned)                 | 0 (0)   |
|                                  | Candesartan (Atacand)              | 4 (2)   |
|                                  | Losartan (Cozaar)                  | 4 (2)   |
|                                  | Amlodipine (Norvasc)               | 5 (2)   |
|                                  | Verapamil (Calan, Isoptin)         | 4 (2)   |
|                                  | Diltiazem (Cardizem)               | 5 (2)   |
| Diuretics                        | Furosemide (Lasix)                 | 2 (1)   |
|                                  | Bumetanide (Bumex)                 | 0 (0)   |
|                                  | Hydrochlorothiazide (Microzide)    | 3 (1)   |
|                                  | Chlorthalidone (Thalitone)         | 0 (0)   |
|                                  | Acetazolamide (Diamox)             | 3 (1)   |
|                                  | Spirolactone (Aldactone, CaroSpir) | 7 (3)   |
| Salt Supplements                 | SaltStick                          | 11 (5)  |
| Anti-Hypotensive Treatments      | Midodrine (Proamatine)             | 7 (3)   |
| Antiarrhythmics                  | Amiodarone (Nexterone)             | 0 (0)   |
|                                  | Flecainide (Tambocor)              | 2 (1)   |
| Lipid Lowering Medications       | Pravastatin (Pravachol)            | 11 (5)  |
|                                  | Atorvastatin (Lipitor)             | 17 (7)  |
|                                  | Rosuvastatin (Crestor)             | 7 (3)   |

|                                   |                                                                                                                                                           |         |
|-----------------------------------|-----------------------------------------------------------------------------------------------------------------------------------------------------------|---------|
| Other Respiratory Treatments      | Bronchodilators (Albuterol, Salmeterol, Formoterol, Ipratropium, Tiotropium, other)                                                                       | 26 (11) |
|                                   | Nasal spray (Flonase [Fluticasone], Nasocort [Triamcinolone], Afrin [Oxymetazoline], other)                                                               | 59 (24) |
| Other Gastrointestinal Treatments | Proton pump inhibitors (Omeprazole [Prilosec], Esomeprazole [Nexium])                                                                                     | 43 (18) |
|                                   | Anti-nausea medication (Ondansetron [Zofran], Prochlorperazine [Compazine], Promethazine [Phenergan], Metoclopramide [Reglan])                            | 25 (10) |
|                                   | Antispasmodics (Hyoscyamine [Levsin], Dicyclomine [Bentyl], Clidinium and chlordiazepoxide [Librax], atropine, scopolamine, and phenobarbital [Donnatal]) | 7 (3)   |
|                                   | Laxatives, stool softeners                                                                                                                                | 32 (13) |
|                                   | Antidiarrheal (Diphenoxylate [Lomotil], Loperamide [Imodium], Bismuth subsalicylate [Kaopectate, Pepto Bismol])                                           | 10 (4)  |
|                                   | Treatment for SIBO (Rifaximin [Xifaxan], other)                                                                                                           | 4 (2)   |
|                                   | Simethicone (Gas-X)                                                                                                                                       | 16 (7)  |
| Psychedelics                      | Lysergic Acid Diethylamide (LSD)                                                                                                                          | 0 (0)   |
|                                   | Psilocin (4-HO-DMT)                                                                                                                                       | 3 (1)   |
|                                   | 3, 4-Methylenedioxymethamphetamine (MDMA)                                                                                                                 | 0 (0)   |
|                                   | Ayahuasca                                                                                                                                                 | 0 (0)   |
| Pain Medications                  | Lidocaine                                                                                                                                                 | 16 (7)  |
|                                   | Capsaicin                                                                                                                                                 | 8 (3)   |
|                                   | Tramadol (ConZip, Qdolo, Ultram)                                                                                                                          | 4 (2)   |
|                                   | Ketorolac (Toradol)                                                                                                                                       | 6 (2)   |
|                                   | Celecoxib (Celebrex, Elyxyb)                                                                                                                              | 8 (3)   |
|                                   | Opioid analgesics (Morphine, Buprenorphine, Codeine, Fentanyl, Oxycodone, Hydrocodone, Hydromorphone, other)                                              | 10 (4)  |
| Other Medications                 | Ketamine (Ketalar)                                                                                                                                        | 2 (1)   |
|                                   | Botulinum toxin injection (Botox)                                                                                                                         | 9 (4)   |
| Non-Pharmacological Agents        | Enhanced External Counterpulsation (EECP)                                                                                                                 | 1 (0.4) |
|                                   | Diets: Low histamine diet                                                                                                                                 | 83 (34) |
|                                   | Diets: Low salt diet                                                                                                                                      | 18 (7)  |
|                                   | Diets: Intermittent fasting                                                                                                                               | 95 (39) |
|                                   | Diets: Other (please describe)                                                                                                                            | 55 (23) |
|                                   | Plasmapheresis/Apheresis                                                                                                                                  | 2 (1)   |
|                                   | Hyperbaric Oxygen Therapy (HBOT)                                                                                                                          | 15 (6)  |

|  |                                                                                |          |
|--|--------------------------------------------------------------------------------|----------|
|  | Red light therapy                                                              | 27 (11)  |
|  | Lymphatic massage                                                              | 37 (15)  |
|  | Cranio-sacral massage                                                          | 24 (10)  |
|  | Home oxygen                                                                    | 6 (2)    |
|  | Physical therapy: Vestibular                                                   | 15 (6)   |
|  | Physical therapy: Vestibular-ocular                                            | 6 (2)    |
|  | Physical therapy: Speech                                                       | 4 (2)    |
|  | Physical therapy: Strengthening, stamina                                       | 36 (15)  |
|  | Physical therapy: Rehabilitation                                               | 35 (15)  |
|  | Vision therapy                                                                 | 6 (2)    |
|  | Cognitive behavioral therapy (e.g. for tinnitus, hearing disorders)            | 13 (5)   |
|  | Hearing devices/maskers for tinnitus                                           | 11 (5)   |
|  | Integrative medicine treatments: IV ozone                                      | 7 (3)    |
|  | Integrative medicine treatments: IV vitamins                                   | 25 (10)  |
|  | Integrative medicine treatments: Treatment for EBV, CMV, herpes, Lymes disease | 9 (4)    |
|  | Chinese medicine treatments: Herbs                                             | 25 (10)  |
|  | Chinese medicine treatments: Acupuncture                                       | 60 (25)  |
|  | Ayurveda medicine                                                              | 7 (3)    |
|  | Lifestyle changes: Diet change                                                 | 95 (39)  |
|  | Lifestyle changes: No alcohol or caffeine                                      | 105 (44) |
|  | Lifestyle changes: Hydration, increase or decrease salt intake                 | 105 (44) |
|  | Lifestyle changes: Limiting exercise or exertion                               | 124 (51) |
|  | Chiropractic treatment                                                         | 44 (18)  |

NSAID, Non-steroidal Anti-inflammatory Drug; PVS, Post-vaccination Syndrome
